# Supplementary material for: Metal halide perovskites for light-emitting diodes
Source: Springer Nature journal article supplement (doi:10.1038/s41563-020-0784-7), 2020-09-14
Supplement: 41563_2020_784_MOESM1_ESM.pdf [file 41563_2020_784_MOESM1_ESM.pdf]

**Supplementary information**

---

**Metal halide perovskites for light-emitting diodes**

---

In the format provided by the authors and unedited

## Supplementary Information for

### Metal halide perovskites for light-emitting diodes

Xiao-Ke Liu<sup>1†</sup>, Weidong Xu<sup>1†</sup>, Sai Bai<sup>1†</sup>, Yizheng Jin<sup>2</sup>, Jianpu Wang<sup>3</sup>, Richard H. Friend<sup>4</sup> and Feng Gao<sup>1\*</sup>

<sup>1</sup>Department of Physics, Chemistry and Biology (IFM), Linköping University, Linköping SE-58183, Sweden.

<sup>2</sup>Center for Chemistry of High-Performance and Novel Materials, State Key Laboratory of Silicon Materials, and Department of Chemistry, Zhejiang University, 310027 Hangzhou, China.

<sup>3</sup>Key Laboratory of Flexible Electronics (KLOFE) & Institute of Advanced Materials (IAM), Jiangsu National Synergetic Innovation Center for Advanced Materials (SICAM), Nanjing Tech University (NanjingTech), 30 South Puzhu Road, 211816 Nanjing, China.

<sup>4</sup>Cavendish Laboratory, J J Thomson Avenue, Cambridge CB3 0HE, UK.

<sup>†</sup>These authors contributed equally to this work.

\*e-mail: feng.gao@liu.se

**Supplementary Table 1.** Summary of performance parameters of blue, green, red and near-infrared PeLEDs used for the Figure B1,b and Figure 4a.

| Color | Peak Wavelength (nm) | Peak EQE (%) | Maximum Luminance (cd m <sup>-2</sup> ) <sup>a</sup> | Ref.                                                           | Figure B1,b | Figure 4a |
|-------|----------------------|--------------|------------------------------------------------------|----------------------------------------------------------------|-------------|-----------|
| Blue  | 490                  | 1.9          | 35                                                   | <i>Adv. Mater.</i> 28, 8718 (2016).                            |             | √         |
|       | 490                  | 1.5          | 2600                                                 | <i>Nat. Commun.</i> 9, 3541 (2018).                            |             | √         |
|       | 488                  | 1.41         | 830                                                  | <i>Adv. Mater.</i> 30, 1706226 (2018).                         |             | √         |
|       | 487                  | 6.2          | 3340                                                 | <i>Chem. Mater.</i> 31, 83–89 (2019).                          | √           | √         |
|       | 485                  | 2.6          | 200                                                  | <i>ACS Appl. Mater. Interfaces</i> 9, 29901–29906 (2017).      |             | √         |
|       | 485                  | 11.0         | 9040                                                 | <i>Nat. Commun.</i> 10, 5633 (2019).                           | √           | √         |
|       | 483                  | 9.5          | 770                                                  | <i>Nat. Photon.</i> 13, 760–764 (2019).                        | √           | √         |
|       | 480                  | 5.7          | 3780                                                 | <i>Nat. Commun.</i> 10, 1027 (2019).                           |             | √         |
|       | 477                  | 4.8          | 5500                                                 | <i>Nat. Commun.</i> 10, 5633 (2019).                           |             | √         |
|       | 476                  | 2.25         | 678                                                  | <i>ACS Energy Lett.</i> 4, 2703–2711 (2019).                   |             | √         |
|       | 475                  | 1.35         | 100.3                                                | <i>Nat. Commun.</i> 10, 1868 (2019).                           |             | √         |
|       | 471                  | 6.3          | 465                                                  | <i>ACS Energy Lett.</i> 5, 3, 793–798 (2020).                  | √           | √         |
|       | 470                  | 2.4          | 612                                                  | <i>ACS Appl. Mater. Interfaces</i> 12, 12, 14195–14202 (2020). |             | √         |
|       | 469                  | 0.5          | 111                                                  | <i>Adv. Mater.</i> 30, 1706226 (2018).                         |             | √         |
|       | 468                  | 0.71         | 122                                                  | <i>Adv. Opt. Mater.</i> 8, 1901094 (2020).                     |             | √         |
|       | 467                  | 2.4          | 962                                                  | <i>Chem. Mater.</i> 31, 83–89 (2019).                          |             | √         |
|       | 465                  | 2.34         | 144                                                  | <i>ACS Energy Lett.</i> 5, 5, 1593–1600 (2020).                |             | √         |
|       | 465                  | 2.12         | 245                                                  | <i>Joule</i> 2, 2421–2433 (2018).                              | √           | √         |
|       | 465                  | 2.6          | 211                                                  | <i>Adv. Mater.</i> 31, 1904319 (2019).                         |             | √         |

|       |      |       |                                       |                                                            |   |   |
|-------|------|-------|---------------------------------------|------------------------------------------------------------|---|---|
|       | 463  | 1.2   | 318                                   | <i>ACS Appl. Mater. Interfaces</i> 11, 21655–21660 (2019). |   | √ |
| Green | ~540 | 8.53  | ~20000                                | <i>Science</i> 350, 1222–1225 (2015).                      | √ |   |
|       | 534  | 1.2   | ~700                                  | <i>Nano Lett.</i> 15, 2640–2644 (2015).                    | √ |   |
|       | 532  | 14.36 | 9120                                  | <i>Nat. Commun.</i> 9, 570 (2018).                         | √ | √ |
|       | 526  | 16.3  | 13970                                 | <i>ACS Nano</i> 12, 8, 8808–8816 (2018).                   |   | √ |
|       | 525  | 20.3  | 14000                                 | <i>Nature</i> 562, 245–248 (2018).                         | √ | √ |
|       | 524  | 12.9  | 22830                                 | <i>Nano Lett.</i> 18, 5, 3157–3164 (2018).                 |   | √ |
|       | 523  | 9.3   | 496320                                | <i>Appl. Phys. Rev.</i> 6, 031402 (2019).                  |   | √ |
|       | 520  | 10.4  | 91000                                 | <i>Nat. Commun.</i> 8, 15640 (2017).                       | √ | √ |
|       | 518  | 16.48 | 76940                                 | <i>Adv. Mater.</i> 30, 1805409 (2018).                     | √ | √ |
|       | 518  | 15.6  | 100080                                | <i>Adv. Mater.</i> 30, 1805409 (2018).                     |   | √ |
|       | 516  | 0.12  | 926                                   | <i>Adv. Mater.</i> 44, 7162 (2015).                        | √ |   |
|       | 515  | 11.6  | 55800                                 | <i>Adv. Mater.</i> 30, 1800764 (2018).                     | √ |   |
|       | 514  | 10.4  | 14000                                 | <i>ACS Nano</i> 11, 11100–11107 (2017).                    |   | √ |
|       | 514  | 15.5  | 7000                                  | <i>Nat. Commun.</i> 9, 3892 (2018).                        | √ | √ |
|       | 514  | 13.14 | 45990                                 | <i>Adv. Opt. Mater.</i> 7, 1801534 (2019).                 |   | √ |
|       | 512  | 14.4  | 23380                                 | <i>ACS Appl. Mater. Interfaces</i> 10, 24320–24326 (2018). |   | √ |
|       | 512  | 17.4  | 8353                                  | <i>Adv. Opt. Mater.</i> 7, 1900747 (2019).                 |   | √ |
| 512   | 6.27 | 15185 | <i>Adv. Mater.</i> 6, 1603885 (2017). | √                                                          |   |   |
| Red   | 698  | 5.7   | 206                                   | <i>Adv. Mater.</i> 28, 3528–3534 (2016).                   |   | √ |
|       | 691  | 13.5  | 1152                                  | <i>Adv. Mater.</i> 30, 1804691 (2018).                     |   | √ |
|       | 690  | 11.2  | 1106                                  | <i>ACS Energy Lett.</i> 3, 1571–1577 (2018).               |   | √ |
|       | 688  | 5.02  | 748                                   | <i>J. Am. Chem. Soc.</i> 140, 562–565 (2018).              |   | √ |

|               |      |      |       |                                                    |   |   |
|---------------|------|------|-------|----------------------------------------------------|---|---|
|               | 686  | 13.7 | 14725 | <i>Nano Lett.</i> 20, 4, 2829–2836 (2020).         |   | √ |
|               | 682  | 8.65 | 210   | <i>Adv. Funct. Mater.</i> 28, 1804285 (2018).      |   | √ |
|               | 680  | 6.23 | 1392  | <i>Adv. Mater.</i> 30, 1707093 (2018).             |   | √ |
|               | 678  | 5.92 | 1250  | <i>J. Am. Chem. Soc.</i> 141, 2069–2079 (2019).    |   | √ |
|               | 664  | 13.3 | 968   | <i>ACS Photon.</i> 6, 587–594 (2019).              |   | √ |
|               | 653  | 21.3 | 500   | <i>Nat. Photon.</i> 12, 681–687 (2018).            | √ | √ |
|               | 650  | 4.6  | 20000 | <i>Appl. Phys. Rev.</i> 6, 031402 (2019).          |   | √ |
|               | 648  | 6.3  | 2216  | <i>J. Phys. Chem. Lett.</i> 7, 4602–4610 (2016).   |   | √ |
|               | 645  | 14.1 | 794   | <i>Nat. Photon.</i> 12, 681–687 (2018).            |   | √ |
|               | 637  | 3.55 | 2671  | <i>J. Am. Chem. Soc.</i> 142, 6, 2956–2967 (2020). |   | √ |
|               | 630  | 5.1  | 2000  | <i>Nano Energy</i> 62, 434–441 (2019).             |   | √ |
| Near-infrared | 803  | 20.7 | 390   | <i>Nature</i> 562, 249–253 (2018).                 | √ |   |
|               | 800  | 21.6 | 308   | <i>Nat. Photon.</i> 13, 418–424 (2019).            | √ |   |
|               | 795  | 20.1 | ~5    | <i>Nat. Photon.</i> 12, 783–789 (2018).            | √ |   |
|               | 773  | 0.76 | 13.2  | <i>Nat. Nanotechnol.</i> 9, 687–692 (2014).        | √ |   |
|               | 768  | 3.5  | 20    | <i>Adv. Mater.</i> 27, 2311–2316 (2015).           | √ |   |
|               | ~760 | 8.8  | 80    | <i>Nat. Nanotechnol.</i> 11, 872–877 (2016).       | √ |   |
|               | 763  | 11.7 | 82    | <i>Nat. Photon.</i> 10, 699–704 (2016).            | √ |   |
|               | 748  | 10.4 | -     | <i>Nat. Photon.</i> 11, 108–115 (2017).            | √ |   |

<sup>a</sup> Maximum radiance ( $\text{W sr}^{-1} \text{m}^{-2}$ ) for near-infrared PeLEDs.
